# Supplementary material
Source: PubMed Central journal article supplement (PMC3967513)
Supplement: NIHMS562720-supplement-1.pdf [file NIHMS562720-supplement-1.pdf]

Supplemental Table I. Genes of Interest Over Time

| 2 Hour                                        |         |       |         | 1 Day   |         |       |         | 3 Day   |         |       |         |
|-----------------------------------------------|---------|-------|---------|---------|---------|-------|---------|---------|---------|-------|---------|
| Gene                                          | Neonate | Adult | Elderly | Gene    | Neonate | Adult | Elderly | Gene    | Neonate | Adult | Elderly |
| <b>Chemotaxis</b>                             |         |       |         |         |         |       |         |         |         |       |         |
| Cxcl10                                        | 2.1     | 4.6   | 6.2     | Cxcl10  | 1.3     | 7.8   | 1.5     |         |         |       |         |
| Cxcl2                                         | 147.1   | 210.6 | 170     |         |         |       |         | Cxcl2   | 5.8     | 13.1  | 1.5     |
|                                               |         |       |         | Cxcl3   | 5.8     | 396.0 | 145.8   | Cxcl3   | 1.5     | 2.5   | 1.6     |
|                                               |         |       |         | Cxcl13  | 4.8     | 17.4  | 2.9     | Cxcl13  | 1.6     | 2.4   | -1.5    |
| <b>Antimicrobial Peptides/Proteins</b>        |         |       |         |         |         |       |         |         |         |       |         |
| Ltf                                           | 1.5     | 7.0   | 29      | Ltf     | -3.1    | 12.0  | 11.0    | Ltf     | -1.2    | 53.7  | 5.3     |
|                                               |         |       |         | Arg1    | 3.7     | 19.6  | 10.7    | Arg1    | 2.2     | 19.4  | 4.9     |
| <b>Co-Stimulatory Molecules on Leukocytes</b> |         |       |         |         |         |       |         |         |         |       |         |
| Cd28                                          | -2.4    | 2.0   | -2.0    | Cd28    | -4.0    | 1.0   | -2.6    | Cd28    | -6.4    | -3.4  | 1.5     |
| Cd40                                          | -1.2    | 4.3   | -2.2    | Cd40    | 2.1     | -1.4  | -2.9    | Cd40    | 1.4     | -3.6  | -2.0    |
| Btla                                          | -1.3    | 2.3   | 1.3     | Ctla4   | 1.4     | 3.3   | 1.8     | Cd27    | -7.3    | -3.0  | -1.3    |
| Ctla2a                                        | 1.9     | -1.4  | 1.5     |         |         |       |         | Ctla2a  | 1.3     | 1.4   | 1.4     |
| <b>PAMP Detection</b>                         |         |       |         |         |         |       |         |         |         |       |         |
| Cd14                                          | 10      | 14.2  | 29.5    | CD14    | -3.3    | 8.4   | 7.0     | Tlr4    | 1.1     | 2.8   | 1.6     |
| <b>Inflammation Related Peptides/Proteins</b> |         |       |         |         |         |       |         |         |         |       |         |
| Il-10                                         | 1.9     | 5.3   | 1.9     | Il-10   | 1.6     | 19.7  | 2.5     | Il-10   | 1.6     | 1.8   | -1.4    |
| Tnfaip3                                       | 4.1     | 14    | 18.6    | Tnfaip3 | -1.3    | 11.2  | 2.4     | IfnG    | 1.2     | -1.5  | -2.9    |
| Irg1                                          | 31.5    | 109   | 124.3   | Irg1    | 1.3     | 36    | 22.6    | Irg1    | 7.3     | 4.8   | 2.6     |
| Casp1                                         | -1.1    | -3.5  | -1.6    | Casp1   | -1.8    | -1.9  | -1.6    | Casp1   | 1.0     | -2.0  | 1.5     |
| Il-6                                          | 13.9    | 11.4  | 6.4     | Il-6    | -1.2    | 51.6  | 1.7     | Socs3   | 2.6     | 8.5   | 5.8     |
| Il-1B                                         | 7.8     | 2.3   | 8.6     | Il-1B   | -1.4    | 1.0   | 1.5     | Il-1B   | 1.1     | -1.3  | 3.0     |
| Hmgb1                                         | -1.4    | 2.3   | 1.3     |         |         |       |         | Hmgb1   | -2.5    | -1.9  | 1.4     |
| <b>Other Immune Related Genes</b>             |         |       |         |         |         |       |         |         |         |       |         |
| Cd69                                          | -1.4    | 2.4   | 1.4     | Cd69    | -1.1    | 1.5   | -2.6    | Cd69    | -2.3    | -2.9  | -1.3    |
| Cd44                                          | 1.7     | 3.2   | 2.1     | Cd44    | -3      | 1.5   | 1.4     | Cd44    | 1.5     | 1.5   | 2.9     |
| Trem1                                         | 7       | 2.8   | 9.7     | Trem1   | 2       | 4     | 3.4     | Trem1   | 1.7     | 3     | 2.3     |
| Tf                                            | -38.2   | -3.3  | -1.5    | Tf      | -13     | -2.1  | -4.5    | Tf      | -4.6    | -4.3  | -2.3    |
| Mhc2-Q1                                       | -10.5   | 1.6   | -1.0    | Mhc2-Q1 | -12.7   | 1.4   | 1.4     | Mhc2-Q1 | -19.5   | 1.7   | -1.1    |

Table showing the fold changes of selected genes from neonatal, adult, and elderly mice 2 hours, 1 day, and 3 days after cecal slurry as compared to control mice ( $p < 0.001$ ).

### A. WBC Differential in Healthy Naïve Mice

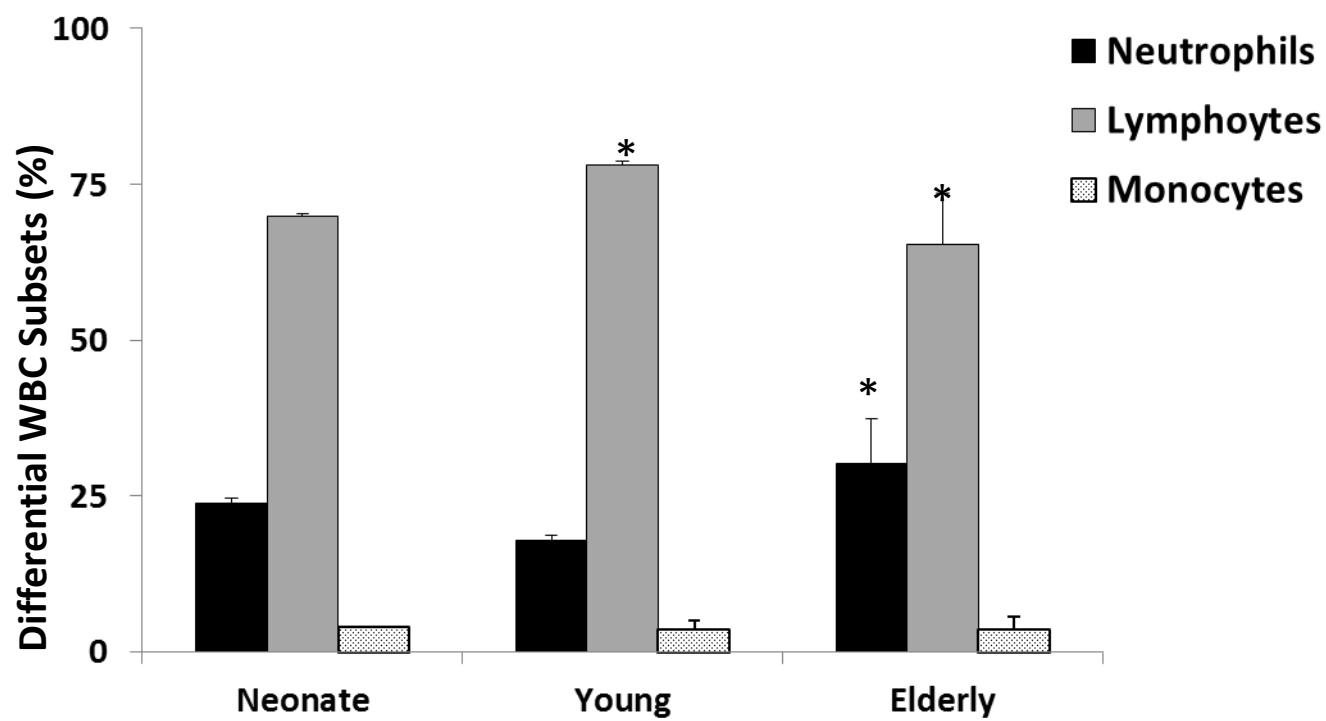

### B. WBC Differential 24 Hours after Sepsis

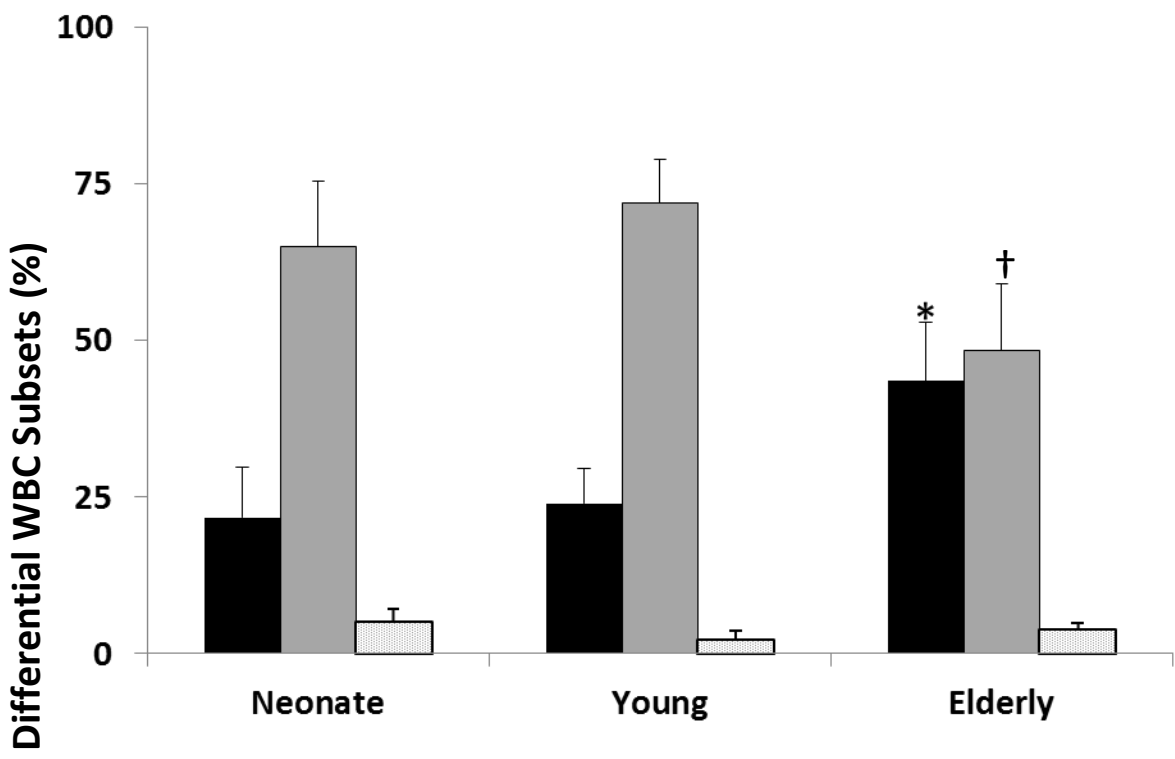

**Supplemental Figure 1 A.** Differential WBC subsets in naïve animals. n=3-6, (\* p<0.05). **B.** Differential WBC subsets 24 hours after sepsis. N=3-6. (\*p<0.05) (†p= 0.004).

**Supplemental Table 2. Immune Cell Trafficking-Activation** Table contains complete list of genes included in the functional category 'Immune Cell Trafficking-Activation.'

| Genes     | Neo   | Young Adult | Elderly |
|-----------|-------|-------------|---------|
| AIP       |       | -1.6        | -3.7    |
| BCL11B    | -6    | -1.5        | -3.5    |
| BCL2      | 1     | 2.2         | 3.6     |
| BCL2L11   | -1.44 | 4.9         | 4.6     |
| BCL3      | 1.5   | 3.8         | 2.2     |
| BCR       | 1.3   | -1.9        | 1.8     |
| C5AR1     | -1.4  | 4           | 3.4     |
| CALR      | -1.5  | 2.1         | -2.5    |
| CAMP      | -1.1  | 16.1        | 11.3    |
| CARD11    |       | -2.3        | -1.3    |
| CCL2      |       | 83.9        | 4.9     |
| CCL4      | 1.5   | 10.8        | 2.1     |
| CD14      | -3.3  | 8.4         | 6.9     |
| CD180     | -1.5  | -1.2        | -2.5    |
| CD48      | -5.3  | -4.5        | -10.1   |
| Cd55/Daf2 | 1.8   | -11.8       | -8.6    |
| CLEC4E    | -1.1  | 7.4         | 2.1     |
| CMAHP     |       | -2.9        | -3.5    |
| CNR2      | -1.1  | -4.1        | -4.1    |
| CPB2      |       | -1.2        | 2.7     |
| CSF1      | 1.7   | 2.3         | -1.9    |
| CSF1R     |       | 1.5         | 1.6     |
| CSF2RB    | -1.7  | 2.9         | 3.4     |
| CSF3      | 1.8   | 8.7         | 1.6     |
| CXCL1     | 5.8   | 395.9       | 145.8   |
| CXCL10    | 1.3   | 7.8         | 1.5     |
| CXCL3     | 8.2   | 231.8       | 115.6   |
| CXCL6     | 1.3   | 5.9         | 1.9     |
| CXCR5     | -1.4  | -5          | -8.5    |
| FCGR2B    | -4    | 5.7         | 2.7     |
| HLA-DMA   | -1.8  | -3.4        | -6.7    |
| HLA-DMB   | 1     | -5.5        | -17.4   |
| HLA-DOA   | 1     | -3          | -5.3    |
| HLA-DQB1  |       | -7.5        | -9      |
| ICAM1     | -1.1  | 3.7         | 1       |
| IL10      | 1.4   | 18.7        | 2.5     |
| IL1A      | 1.5   | 5.2         | 2.9     |
| IL6       | -1.2  | 54.3        | 1.7     |
| ITK       |       | 2.7         | 1.4     |
| KLF4      |       | 1.2         | -1.6    |
| LCN2      | -1.72 | 22.1        | 11.8    |
| LTF       | -3.3  | 12          | 11.1    |
| MALT1     | 1.3   | 2.1         | -1.8    |
| NFKB2     | 1.9   | 2           | 4.3     |
| NFKBID    |       | 1.5         | -1      |
| NFKBIZ    | -1.2  | 5.3         | 2.7     |
| PLSCR1    |       | 8           | 4.2     |
| PPP3CB    | 1.7   | -1.2        | -4      |
| PRKCI     | -1.8  | 1.4         | -2      |
| PTPRC     |       | 1.5         | -2.1    |
| PTPRJ     | 1.9   | 2           | 4.6     |
| PYCARD    | -2.4  | 1.8         | 2.3     |
| RABGEF1   | 1.7   | 3.9         | 2.2     |
| RHOA      | 1.5   | 2.2         | 3.7     |
| RHOB      |       | 2.7         | 1.5     |
| SMAD3     |       | 1.7         | 1       |
| SMPD1     | -1.2  | -1.4        | -2.1    |
| SNCA      | 1.14  | -2.5        | -1.8    |
| SOCS2     | -1.4  | 6.7         | 2.1     |
| STAT1     | -1.54 | 3.8         | -6.5    |
| STAT3     |       | 2.5         | 3.3     |
| TLR7      | 1.5   | 3.3         | -1.9    |
| TNF       | 1.6   | 2.8         | 1.6     |
| TNFSF13   |       | -3.7        | -3.3    |
| TNFSF9    | 1.3   | 2.6         | 1       |
| TRAF5     | -1.1  | -3.2        | -4.9    |
| TREM1     | 2     | 4           | 3.4     |
| VCAN      | 1.7   | 5.9         | 3.6     |
| ZAP70     | -1    | -1.3        | -2.2    |

**A****Neonates**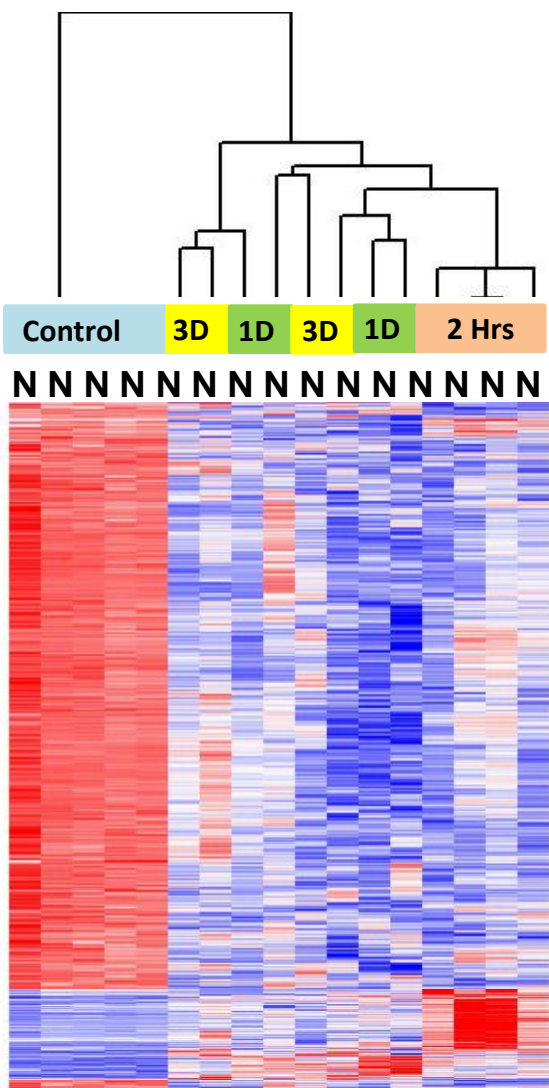**B****Young Adults**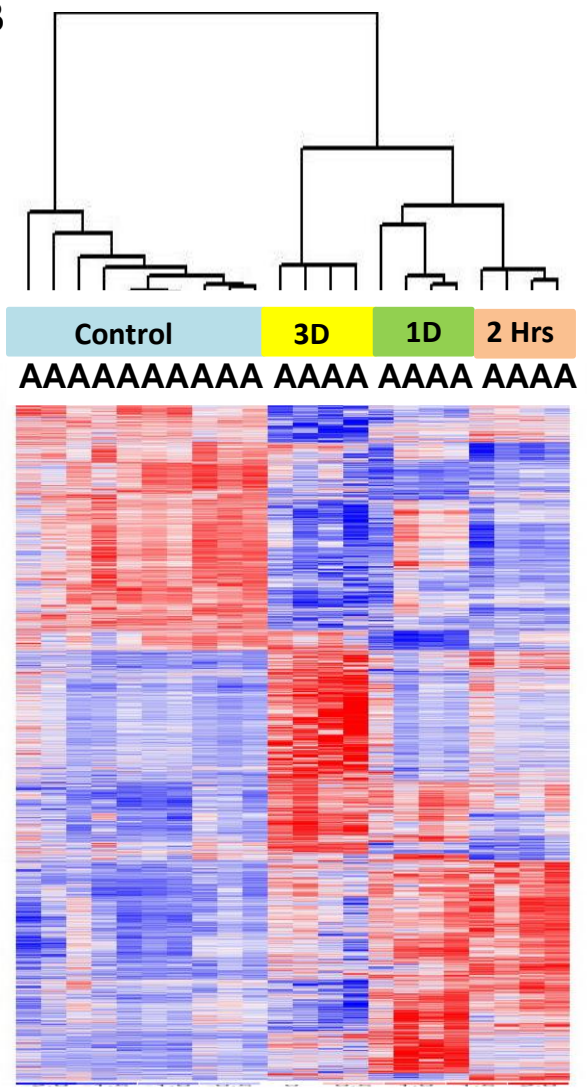**C****Elderly**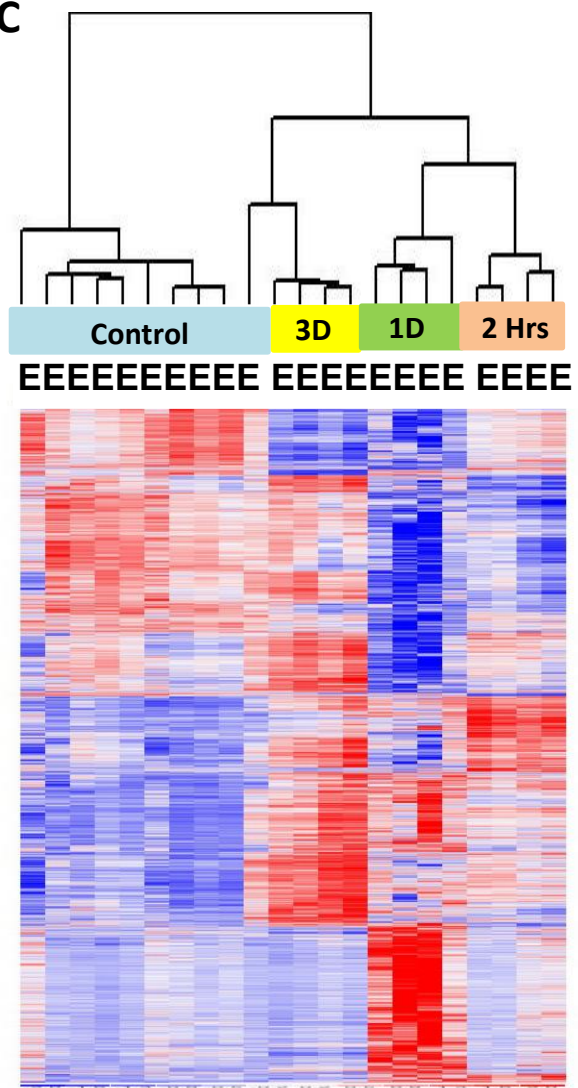

**Supplemental Figure 2. Neonatal and elderly mice have significantly different gene expression patterns in response to CS polymicrobial sepsis over time.** **A.** Heat map showing the neonatal murine response to CS sepsis as compared to neonate control mice over time, with 1183 probe sets significantly changed compared to control ( $p < 0.001$ ). Neonates are unable to up regulate gene expression like adults and remain in a relatively unresponsive genomic state over a 3 day course of sepsis compared to baseline, and only have significant gene expression changes in one-sixth of their genome compared to young adult and elderly mice. **B.** Heat map showing the young adult murine response to CS sepsis as compared to adult control mice over time, with 6,973 probe sets significant at  $p < 0.001$ . **C.** Heat map showing the elderly murine response to CS sepsis as compared to adult control mice over time, with 6,486 probe sets significant at  $p < 0.001$ .
